# Supplementary material for: Highly effective NO decomposition by in situ removal of inhibitor oxygen using an oxygen transporting membrane
Source: Royal Society of Chemistry journal article supplement (doi:10.1039/b912269a), 2009-01-01
Supplement: b912269a.pdf [file b912269a.pdf]

## Supporting Information for

### *Chem. Commun.*

#### **Highly effective NO decomposition by in situ removing inhibitor oxygen using an oxygen transporting membrane\*\***

Heqing Jiang<sup>a</sup>, Lei Xing<sup>a</sup>, Oliver Czuprat<sup>a</sup>, Haihui Wang<sup>a,b,\*</sup>, Steffen Schirrmeister<sup>c</sup>,  
Thomas Schiestel<sup>d</sup>, and Jürgen Caro<sup>a,\*</sup>

<sup>a</sup>*Institute of Physical Chemistry and Electrochemistry, Leibniz University of Hannover, Callinstr. 3A, D-30167 Hannover, Germany*

<sup>b</sup>*School of Chemistry and Chemical Engineering, South China University of Technology, Guangzhou, 510640, PR China*

<sup>c</sup>*Uhde GmbH, Friedrich-Uhde-Str. 15, D-44141 Dortmund, Germany*

<sup>d</sup>*Fraunhofer Institute of Interfacial Engineering and Biotechnology (IGB), Nobelstr 12, D-70569 Stuttgart, Germany*

---

\* Corresponding author.

E-mail address: [juergen.caro@pci.uni-hannover.de](mailto:juergen.caro@pci.uni-hannover.de); [hhwang@scut.edu.cn](mailto:hhwang@scut.edu.cn)

\*\* The authors gratefully acknowledge the financial support of the BMBF for the project 03C0343A SynMem under the auspices of ConNeCat.

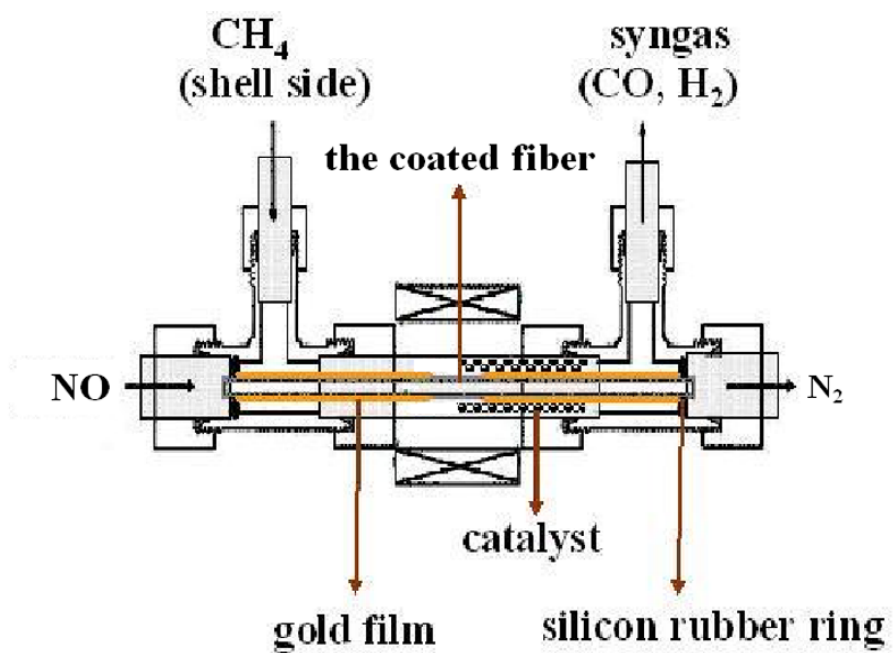

**Figure S1** Schematic diagram of the membrane reactor used in this work
